# Supplementary material
Source: Springer Nature journal article supplement (https://www.springermedizin.de/resource/supplementary/12889_2006_926_MOESM2_ESM.pdf/9502098)

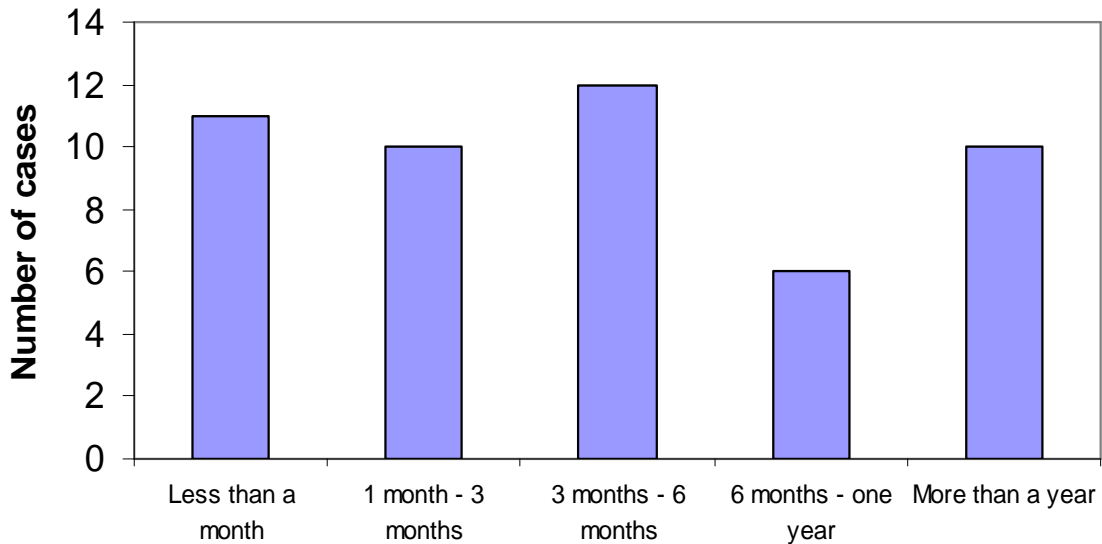

**Interval between development of symptoms to when cases presented to hospital**

Supplement: MOESM2 [file 9502098]
